# Supplementary material for: Health Conditions Associated With Severe Illness From COVID-19 Among Individuals With Serious Mental Illness
Source: Atypon-hosted journal article supplement (doi:10.1176/appi.ps.202000300), 2020-11-19
Supplement: appi.ps.202000300.ds001.pdf [file appi.ps.202000300.ds001.pdf]

Appendix Table 1: Health Conditions by Serious Mental Illness Status

| Health Condition     | Serious Mental Illness | No Serious Mental Illness |
|----------------------|------------------------|---------------------------|
| <b>All Age Group</b> |                        |                           |
| Asthma               | 1,843                  | 19,521                    |
| Bronchitis           | 1,067                  | 6,507                     |
| Cancer               | 679                    | 10,845                    |
| Diabetes             | 1,164                  | 19,521                    |
| Heart Disease        | 1,261                  | 19,521                    |
| Hypertension         | 2,328                  | 36,873                    |
| Kidney Disease       | 291                    | 2,169                     |
| Liver Cirrhosis      | 582                    | 2,169                     |
| Nicotine Dependence  | 2,037                  | 17,352                    |
| Obesity              | 4,462                  | 82,422                    |

Table 2: Percentage Health Conditions by Serious Mental Illness Status

| Health Condition     | Serious Mental Illness<br>(Percentage/Confidence Interval) | No Serious Mental Illness<br>(Percentage/Confidence Interval) | P-Value |
|----------------------|------------------------------------------------------------|---------------------------------------------------------------|---------|
| <b>All Age Group</b> |                                                            |                                                               |         |
| Asthma               | 19%<br>[0.18, 0.21]                                        | 9%<br>[0.09, 0.10]                                            | 0.0000  |
| Bronchitis           | 11%<br>[0.10, 0.12]                                        | 3%<br>[0.03, 0.04]                                            | 0.0000  |
| Cancer               | 7%<br>[0.05, 0.06]                                         | 5%<br>[0.05, 0.06]                                            | 0.0542  |
| Diabetes             | 12%<br>[0.11, 0.13]                                        | 9%<br>[0.09, 0.10]                                            | 0.0000  |
| Heart Disease        | 13%<br>[0.11, 0.13]                                        | 9%<br>[0.09, 0.11]                                            | 0.0000  |
| Hypertension         | 24%                                                        | 17%                                                           | 0.0000  |

|                     |                        |                        |        |
|---------------------|------------------------|------------------------|--------|
|                     | [0.23, 0.25]           | [0.16, 0.18]           |        |
| Kidney Disease      | 3%<br>[0.03, 0.04]     | 1%<br>[0.03, 0.04]     | 0.0389 |
| Liver Cirrhosis     | 6%<br>[0.05, 0.07]     | 1%<br>[0.002, 0.003]   | 0.0000 |
| Nicotine Dependence | 21%<br>[0.20, 0.23]    | 8%<br>[0.07, 0.08]     | 0.0000 |
| Obesity             | 46%<br>[0.45, 0.47]    | 38%<br>[0.38, 0.39]    | 0.0000 |
| N                   | 9,700                  | 216,900                |        |
| Weighted N          | 10.8 million           | 260 million            |        |
| <b>Age &lt; 65</b>  |                        |                        |        |
| Asthma              | 19%<br>[0.18, 0.24]    | 10%<br>[0.09, 0.10]    | 0.0000 |
| Bronchitis          | 10%<br>[0.09, 0.11]    | 3%<br>[0.02, 0.03]     | 0.0000 |
| Cancer              | 5%<br>[0.05, 0.06]     | 3%<br>[0.02, 0.03]     | 0.0624 |
| Diabetes            | 10%<br>[0.09, 0.12]    | 6%<br>[0.06, 0.07]     | 0.0000 |
| Heart Disease       | 11%<br>[0.09, 0.12]    | 5%<br>[0.05, 0.06]     | 0.0000 |
| Hypertension        | 22%<br>[0.20, 0.23]    | 9%<br>[0.08, 0.09]     | 0.0000 |
| Kidney Disease      | 3%<br>[0.02, 0.03]     | 1%<br>[0.001, 0.01]    | 0.0593 |
| Liver Cirrhosis     | 0.5%<br>[0.003, 0.009] | 0.2%<br>[0.001, 0.002] | 0.0562 |
| Nicotine Dependence | 22%<br>[0.20, 0.23]    | 9%<br>[0.08, 0.09]     | 0.0000 |
| Obesity             | 46%<br>[0.44, 0.47]    | 38%<br>[0.38, 0.39]    | 0.0000 |
| N                   | 9,400                  | 202,000                |        |
| Weighted N          | 10 million             | 211 million            |        |
| <b>Age 65+</b>      |                        |                        |        |
| Asthma              | 21%<br>[0.15, 0.29]    | 7%<br>[0.06, 0.08]     | 0.0000 |
| Bronchitis          | 26%<br>[0.19, 0.34]    | 9%<br>[0.08, 0.09]     | 0.0000 |
| Cancer              | 24%<br>[0.17, 0.32]    | 17%<br>[0.16, 0.18]    | 0.0759 |
| Diabetes            | 31%<br>[0.23, 0.41]    | 22%<br>[0.21, 0.22]    | 0.0000 |
| Heart Disease       | 33%<br>[0.25, 0.41]    | 27%<br>[0.26, 0.28]    | 0.0000 |
| Hypertension        | 56%<br>[0.47, 0.64]    | 40%<br>[0.39, 0.41]    | 0.0000 |

|                     |                     |                        |        |
|---------------------|---------------------|------------------------|--------|
| Kidney Disease      | 10%<br>[0.06, 0.17] | 5%<br>[0.04, 0.05]     | 0.0000 |
| Liver Cirrhosis     | 2%<br>[0.01, 0.07]  | 0.1%<br>[0.005, 0.008] | 0.0000 |
| Nicotine Dependence | 13%<br>[0.09, 0.19] | 5%<br>[0.04, 0.05]     | 0.0000 |
| Obesity             | 56%<br>[0.46, 0.64] | 39%<br>[0.38, 0.40]    | 0.0000 |
| N                   | 300                 | 14,900                 |        |
| Weighted N          | 0.8 million         | 49 million             |        |
